# Supplementary material for: Separation and Purification of Astragalus membranaceus Polysaccharides by Deep Eutectic Solvents-Based Aqueous Two-Phase System
Source: MDPI journal article supplement (doi:10.3390/molecules27165288), 2022-08-19
Supplement: s1 [file s1]

## Supplementary Materials

# Separation and Purification of *Astragalus Membranaceus* Polysaccharides by Deep Eutectic Solvents-based Aqueous Two-Phase System

Bangfu Liu <sup>1</sup>, Zhijian Tan <sup>2,\*</sup>

<sup>1</sup> Hunan Electronic Information Industry Institute, Changsha 41001, China

<sup>2</sup> Institute of Bast Fiber Crops & Center of Southern Economic Crops, Chinese Academy of Agricultural Sciences, Changsha 410205, China

\* Correspondence: tanzhijian@caas.cn; Tel.: +86-731-8899-8517

**Table S1.** The molecular weight of AMP

|         | Peak 1 (67.4%) | Peak 2 (33.6%) | Average |
|---------|----------------|----------------|---------|
| Mw (Da) | 6654           | 371            | 4856    |

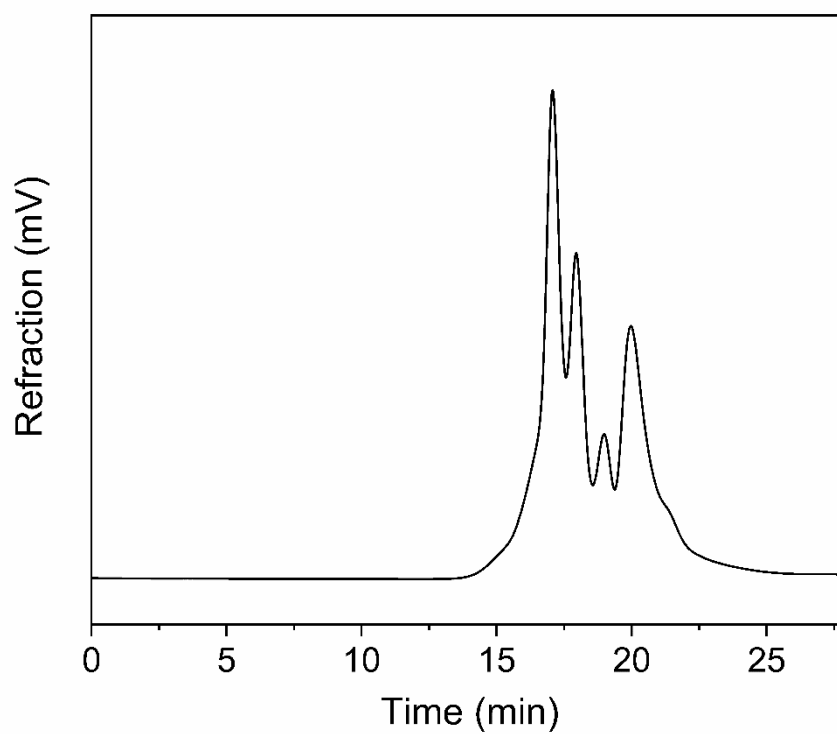

**Figure S1.** High-performance gel permeation chromatograms for AMP.

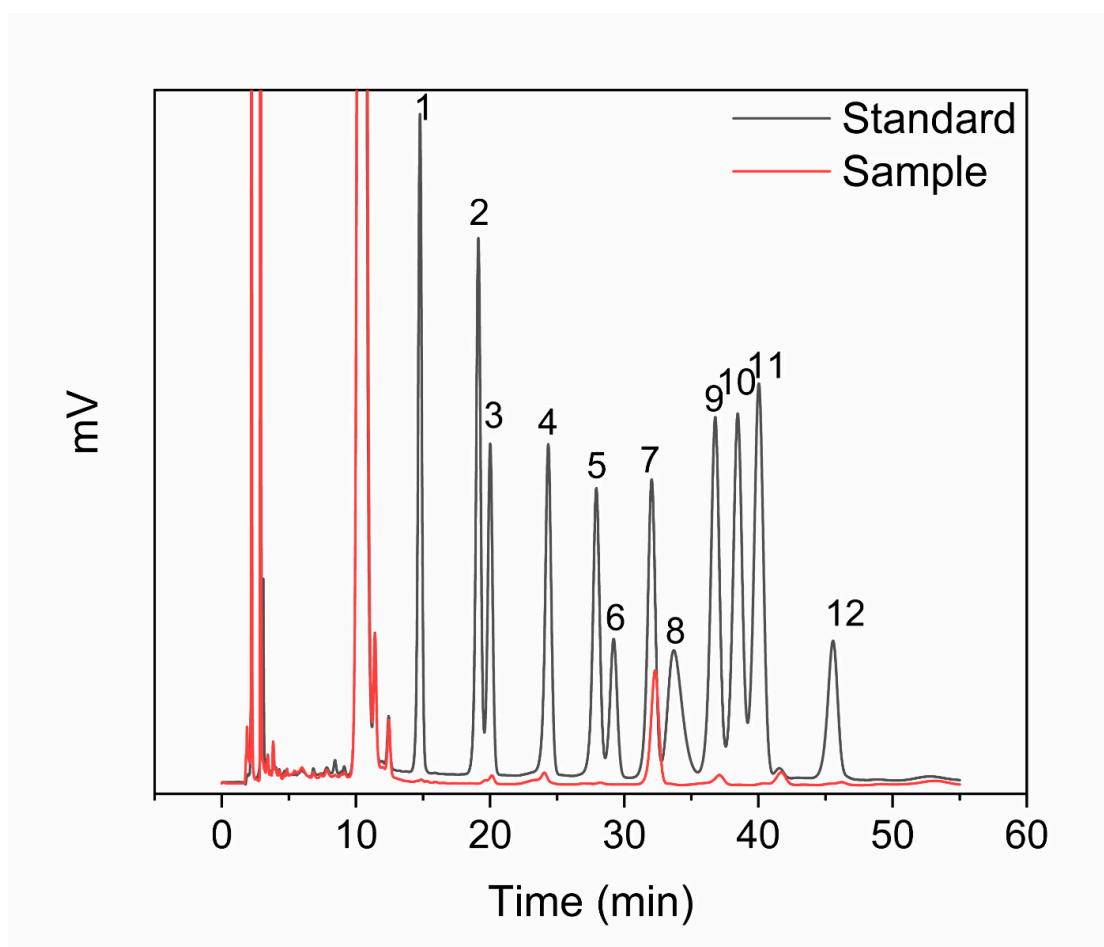

- 1- Mannose
- 2- Ribose
- 3- Rhamnose
- 4- Glucuronic acid
- 5- Galacturonic acid
- 6- N-acetyl-glucosamine
- 7- Glucose
- 8- N-acetyl-galactosamine
- 9- Galactose
- 10- Xylose
- 11- Arabinose
- 12- Fucose

**Figure S2.** The HPLC chromatograms for monosaccharide analysis of AMP

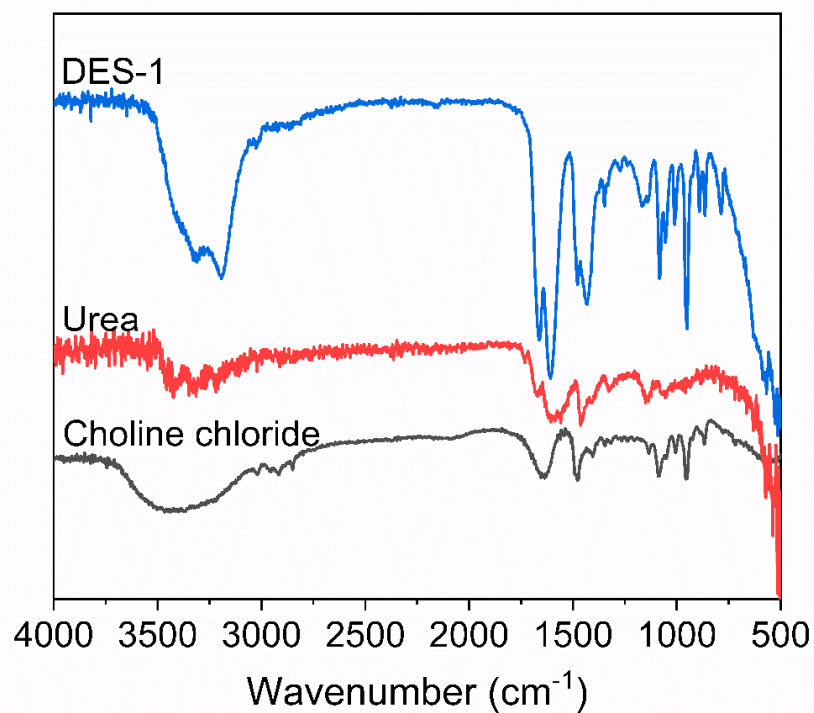

**Figure S3.** The FT-IR spectra for DES-1

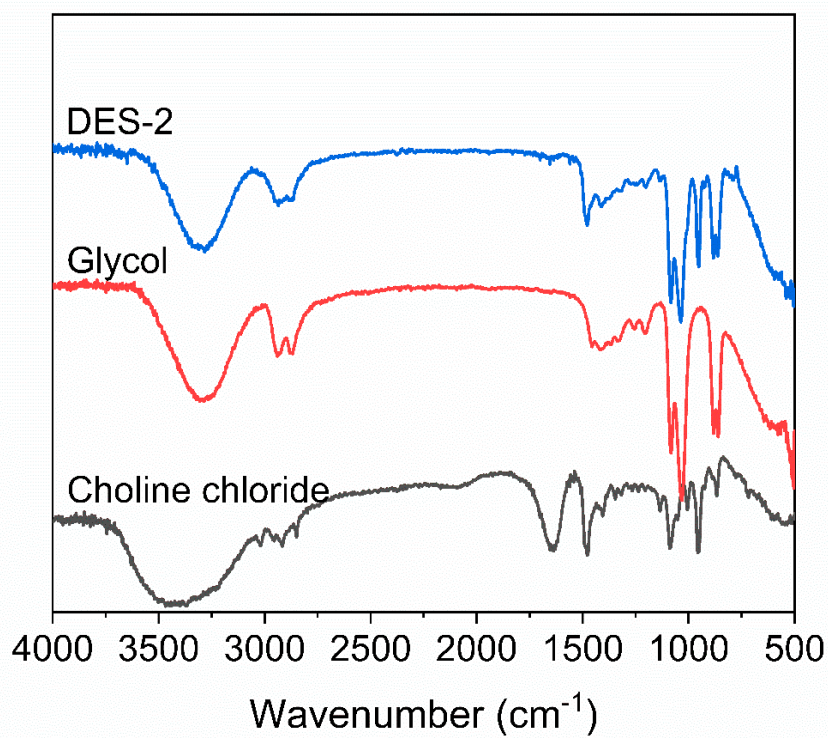

**Figure S4.** The FT-IR spectra for DES-2

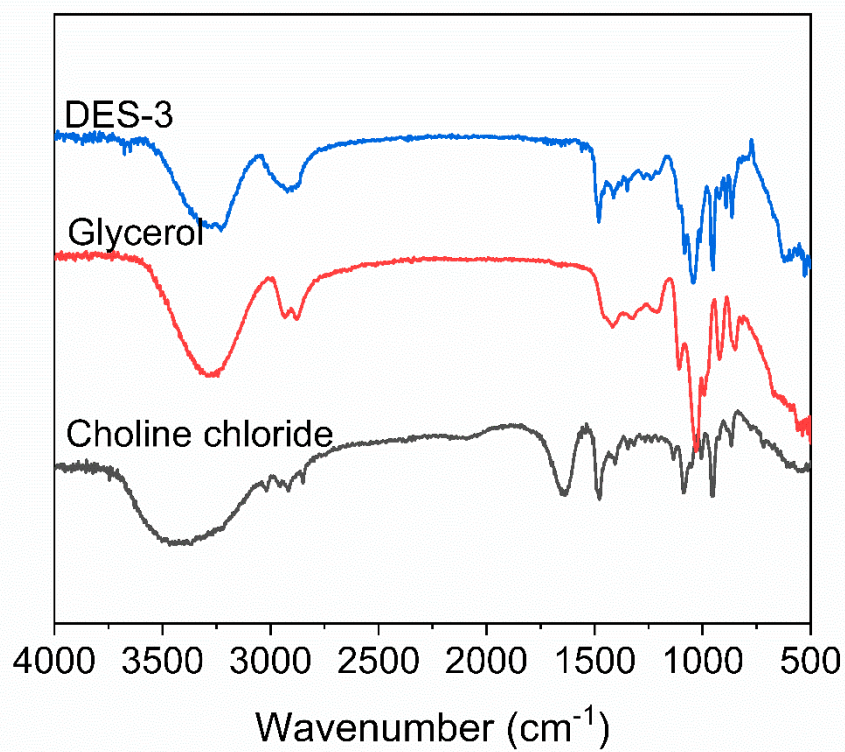

**Figure S5.** The FT-IR spectra for DES-3

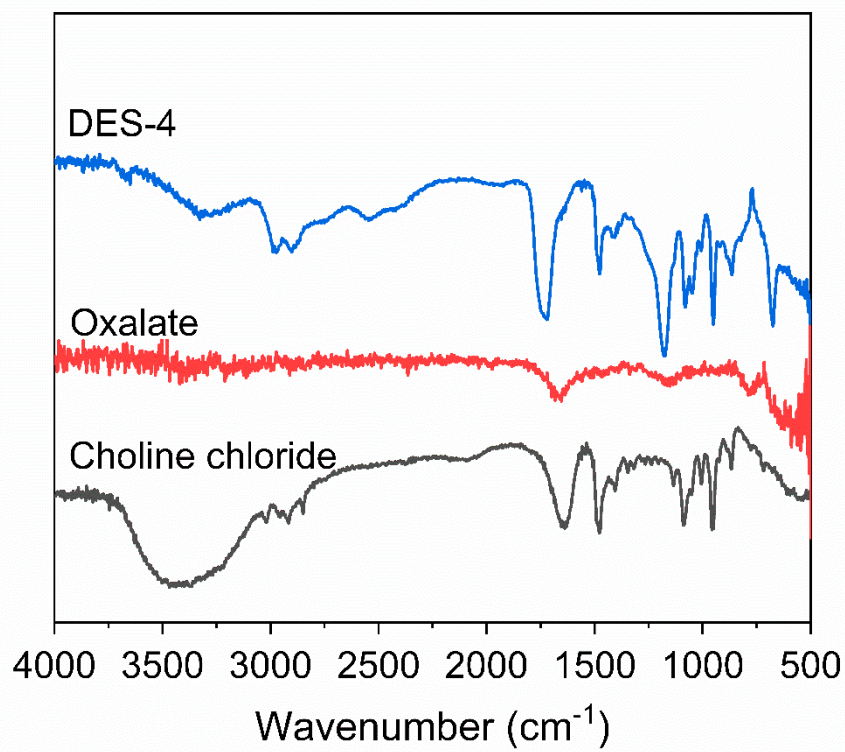

**Figure S6.** The FT-IR spectra for DES-4

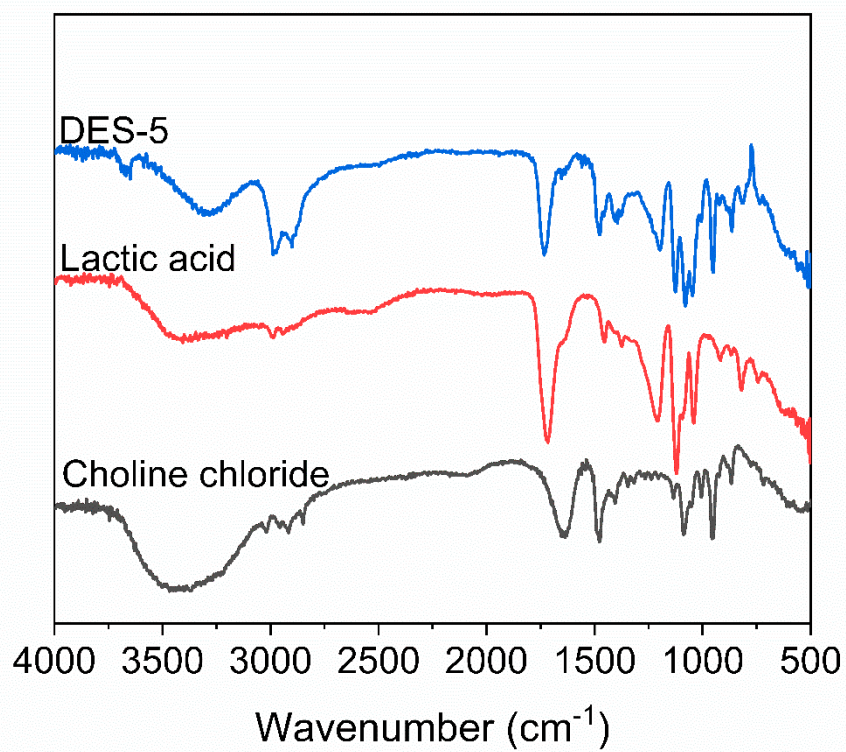

**Figure S7.** The FT-IR spectra for DES-5
